# Supplementary material for: Spatiotemporal profiling of chemicals of emerging concern in a megacity: a case study of Lagos, Nigeria
Source: Royal Society of Chemistry journal article supplement (doi:10.1039/d2ew00034b), 2022-01-01
Supplement: d2ew00034b1.pdf [file d2ew00034b1.pdf]

## **Spatiotemporal profiling of Chemicals of Emerging Concern in a megacity: A case study of Lagos, Nigeria**

**Idera Fabunmi<sup>a,b,c</sup>, Kathryn Proctor<sup>b</sup>, Temilola Oluseyi<sup>a\*</sup>, Aderonke Oyeyiola<sup>a</sup>, Kehinde Olayinka<sup>a</sup>, Barbara Kasprzyk-Hordern<sup>b</sup>**

<sup>a</sup>Department of Chemistry, University of Lagos, Lagos, Nigeria

<sup>b</sup>Department of Chemistry, University of Bath, Bath BA2 7AY, UK

<sup>c</sup>Nigerian Institute for Oceanography and Marine Research, Lagos, Nigeria

\*Corresponding author: [toluseyi@unilag.edu.ng](mailto:toluseyi@unilag.edu.ng)

The supplementary material contains eleven tables:

**Table S1.** Physiochemical properties of target analytes

**Figure S1.** Sample collection points for wastewater and surface water

**Table S2.** Instrument details including chromatographic retention time and mass spectrometry parameters used in the determination of target analytes

**Table S3.** Instrument performance data of target analytes

**Table S4.** Absolute and corrected recoveries in matrices sampled

**Table S5.** Mean concentrations (ng L<sup>-1</sup>) of target compounds in influent and effluent samples

**Table S6.** Concentrations (ng L<sup>-1</sup>) of target compounds in influent and effluent samples at WWTP1

**Table S7.** Concentrations (ng L<sup>-1</sup>) of target compounds in influent and effluent samples at WWTP2

**Table S8.** Concentrations (ng L<sup>-1</sup>) of target compounds in influent and effluent samples at WWTP3

**Table S9.** Concentrations (ng L<sup>-1</sup>) of target compounds in influent and effluent samples at WWTP4

**Table S10.** Concentrations (ng L<sup>-1</sup>) of target compounds in influent samples at SDP1

**Table S11.** Concentrations (ng L<sup>-1</sup>) of target compounds in influent samples at SDP2

**Table S12.** Percentage intra and inter-site variance of target compounds in influent samples

**Table S13.** Maximum Environmental Concentrations (MECs), Predicted No-Effect Concentrations (PNECs) and Risk Quotients (RQs) for target compounds

**Table S1.** Physiochemical properties of target analytes

| Micropollutant class                  | Micropollutant              | CAS No.                                                                        | Molecular Formula                                               | Molecular Weight (g mol <sup>-1</sup> ) | Water Solubility (mg L <sup>-1</sup> ) <sup>[i]</sup> | Log Kow <sup>[ii]</sup> | Log Koc <sup>[iii]</sup> | Log Dow <sup>[iv]</sup> | Henry's Law Constant (atm m <sup>3</sup> mol <sup>-1</sup> ) <sup>[v]</sup> | Vapour Pressure (Torr) <sup>[vi]</sup> | pKa (Most acidic) <sup>[vii]</sup> | pKa (Most basic) <sup>[viii]</sup> |
|---------------------------------------|-----------------------------|--------------------------------------------------------------------------------|-----------------------------------------------------------------|-----------------------------------------|-------------------------------------------------------|-------------------------|--------------------------|-------------------------|-----------------------------------------------------------------------------|----------------------------------------|------------------------------------|------------------------------------|
| Anaesthetic and metabolite            | Ketamine                    | 6740-88-1                                                                      | C <sub>13</sub> H <sub>16</sub> ClNO                            | 237.73                                  | 3.87x10 <sup>3</sup>                                  | 3.12                    | 2.283                    | 3.18                    | 1.38x10 <sup>-8</sup>                                                       | 1.76x10 <sup>-5</sup>                  | -                                  | 6.46±0.20                          |
|                                       | Norketamine                 | 35211-10-0                                                                     | C <sub>15</sub> H <sub>11</sub> ClN <sub>2</sub> O              | 233.70                                  | -                                                     | -                       | -                        | 2.71                    | 1.78x10 <sup>-10</sup>                                                      | 1.26x10 <sup>-5</sup>                  | -                                  | 6.25±0.20                          |
| Analgesics and metabolites            | Morphine                    | 57-27-2                                                                        | C <sub>17</sub> H <sub>19</sub> NO <sub>3</sub>                 | 285.35                                  | 2.64x10 <sup>4</sup>                                  | 0.72                    | 1.163                    | -0.37                   | 1.33x10 <sup>-16</sup>                                                      | 7.06x10 <sup>-10</sup>                 | 9.48±0.40                          | 8.25±0.40                          |
|                                       | Dihydromorphine             | 509-60-4                                                                       | C <sub>17</sub> H <sub>21</sub> NO <sub>3</sub>                 | 287.36                                  | 2.38x10 <sup>4</sup>                                  | 0.93                    | 1.185                    | -0.26                   | 1.51x10 <sup>-16</sup>                                                      | 7.65x10 <sup>-10</sup>                 | 9.56±0.40                          | 8.44±0.40                          |
|                                       | Normorphine                 | 466-97-7                                                                       | C <sub>16</sub> H <sub>17</sub> NO <sub>3</sub>                 | 271.32                                  | 2.56x10 <sup>5</sup>                                  | 0.50                    | 0.599                    | -2.05                   | 6.07x10 <sup>-17</sup>                                                      | 2.99x10 <sup>-10</sup>                 | 9.17±0.40                          | 9.54±0.40                          |
|                                       | Methadone                   | 76-99-3                                                                        | C <sub>21</sub> H <sub>27</sub> NO                              | 309.46                                  | 48.5                                                  | 4.17                    | 3.229                    | 3.39                    | 4.97x10 <sup>-10</sup>                                                      | 2.20x10 <sup>-7</sup>                  | -                                  | 9.50±0.50                          |
|                                       | Codeine                     | 76-57-3                                                                        | C <sub>18</sub> H <sub>21</sub> NO <sub>3</sub>                 | 299.37                                  | 1.22x10 <sup>4</sup>                                  | 1.28                    | 1.218                    | -0.23                   | 7.58x10 <sup>-14</sup>                                                      | 2.47x10 <sup>-9</sup>                  | 13.40±0.20                         | 8.23±0.40                          |
|                                       | Dihydrocodeine              | 125-28-0                                                                       | C <sub>18</sub> H <sub>23</sub> NO <sub>3</sub>                 | 301.39                                  | 6.53x10 <sup>3</sup>                                  | 1.49                    | 1.384                    | -0.11                   | 8.61x10 <sup>-14</sup>                                                      | 2.48x10 <sup>-9</sup>                  | 14.22±0.2                          | 8.43±0.40                          |
|                                       | Norcodeine                  | 467-15-2                                                                       | C <sub>17</sub> H <sub>19</sub> NO <sub>3</sub>                 | 285.35                                  | 3.92x10 <sup>4</sup>                                  | 1.07                    | 0.964                    | -2.28                   | 3.45x10 <sup>-14</sup>                                                      | 1.51x10 <sup>-9</sup>                  | 13.34±0.20                         | 9.28±0.40                          |
|                                       | Tramadol                    | 27203-92-5                                                                     | C <sub>16</sub> H <sub>25</sub> NO <sub>2</sub>                 | 263.38                                  | 1.15x10 <sup>3</sup>                                  | 3.01                    | 1.959                    | 0.72                    | 1.54x10 <sup>-11</sup>                                                      | 1.02x10 <sup>-6</sup>                  | 14.47±0.40                         | 9.61±0.28                          |
|                                       | N-desmethyltramadol         | 75377-45-6                                                                     | C <sub>15</sub> H <sub>23</sub> NO <sub>2</sub>                 | 249.35                                  | -                                                     | -                       | -                        | -0.27                   | -                                                                           | 9.16x10 <sup>-6</sup>                  | 14.46±0.40                         | 10.56±0.10                         |
| O-desmethyltramadol                   | 185453-02-5                 | C <sub>15</sub> H <sub>23</sub> NO <sub>2</sub>                                | 249.35                                                          | -                                       | -                                                     | -                       | 0.38                     | -                       | 3.14x10 <sup>-7</sup>                                                       | 10.00±0.10                             | 9.61±0.28                          |                                    |
| Antibacterial/antibiotics             | Clarithromycin              | 81103-11-9                                                                     | C <sub>38</sub> H <sub>69</sub> NO <sub>13</sub>                | 747.97                                  | 0.3                                                   | 3.18                    | 1.371                    | 2.31                    | 1.73x10 <sup>-29</sup>                                                      | 5.06x10 <sup>-30</sup>                 | 13.08±0.70                         | 8.16±0.70                          |
|                                       | Azithromycin                | 83905-01-5                                                                     | C <sub>38</sub> H <sub>72</sub> N <sub>2</sub> O <sub>12</sub>  | 749.00                                  | 0.1                                                   | 3.24                    | 1.676                    | -2.48                   | 5.30x10 <sup>-29</sup>                                                      | 2.51x10 <sup>-31</sup>                 | 13.28±0.70                         | 8.59±0.70                          |
|                                       | Trimethoprim                | 738-70-5                                                                       | C <sub>14</sub> H <sub>18</sub> N <sub>4</sub> O <sub>3</sub>   | 290.32                                  | 2.33x10 <sup>3</sup>                                  | 0.73                    | 1.896                    | 1.13                    | 2.39x10 <sup>-14</sup>                                                      | 3.74x10 <sup>-11</sup>                 | -                                  | 7.04±0.10                          |
|                                       | Sulfamethoxazole            | 723-46-6                                                                       | C <sub>10</sub> H <sub>11</sub> N <sub>3</sub> O <sub>3</sub> S | 253.28                                  | 3.94x10 <sup>3</sup>                                  | 0.48                    | 1.536                    | -0.03                   | 9.56x10 <sup>-13</sup>                                                      | 1.87x10 <sup>-9</sup>                  | 5.81±0.50                          | 1.39±0.10                          |
| Anti-cancer                           | Azathioprine                | 446-86-6                                                                       | C <sub>9</sub> H <sub>7</sub> N <sub>7</sub> O <sub>2</sub> S   | 277.26                                  | 272.0                                                 | -0.09                   | 2.395                    | 1.21                    | 2.64x10 <sup>-15</sup>                                                      | 5.94x10 <sup>-11</sup>                 | -                                  | 7.47±0.20                          |
|                                       | Methotrexate                | 59-05-2                                                                        | C <sub>20</sub> H <sub>22</sub> N <sub>8</sub> O <sub>5</sub>   | 454.45                                  | 2.60x10 <sup>3</sup>                                  | -1.28                   | -0.387                   | -7.06                   | 1.54x10 <sup>-31</sup>                                                      | -                                      | 3.47±0.10                          | 5.56±0.10                          |
|                                       | Tamoxifen                   | 10540-29-1                                                                     | C <sub>26</sub> H <sub>29</sub> NO                              | 317.53                                  | 0.2                                                   | 6.30                    | 4.400                    | 5.07                    | 4.49x10 <sup>-10</sup>                                                      | 1.85x10 <sup>-9</sup>                  | -                                  | 8.69±0.28                          |
| Ifosfamide                            | 3778-73-2                   | C <sub>7</sub> H <sub>15</sub> Cl <sub>2</sub> N <sub>2</sub> O <sub>2</sub> P | 261.09                                                          | 3.78x10 <sup>3</sup>                    | 0.97                                                  | 1.439                   | 0.10                     | 1.36x10 <sup>-11</sup>  | 1.15x10 <sup>-4</sup>                                                       | -                                      | 1.44±0.20                          |                                    |
| Anti-depressants and metabolites      | Fluoxetine                  | 54910-89-3                                                                     | C <sub>17</sub> H <sub>18</sub> F <sub>3</sub> NO               | 309.33                                  | 60.3                                                  | 4.65                    | 3.050                    | 1.92                    | 8.90x10 <sup>-8</sup>                                                       | 1.88x10 <sup>-6</sup>                  | -                                  | 10.05±0.10                         |
|                                       | Norfluoxetine               | 83891-03-6                                                                     | C <sub>16</sub> H <sub>16</sub> F <sub>3</sub> NO               | 295.30                                  | -                                                     | -                       | -                        | 1.54                    | -                                                                           | 5.21x10 <sup>-6</sup>                  | -                                  | 9.05±0.13                          |
|                                       | Sertraline                  | 79617-96-2                                                                     | C <sub>17</sub> H <sub>17</sub> Cl <sub>2</sub> N               | 306.24                                  | 3.5                                                   | 5.29                    | 3.808                    | 3.11                    | 5.10x10 <sup>-8</sup>                                                       | 3.85x10 <sup>-7</sup>                  | -                                  | 9.47±0.40                          |
|                                       | Citalopram                  | 59729-33-8                                                                     | C <sub>20</sub> H <sub>21</sub> FN <sub>2</sub> O               | 324.40                                  | 31.1                                                  | 3.74                    | 3.230                    | 1.50                    | 2.69x10 <sup>-11</sup>                                                      | 1.53x10 <sup>-7</sup>                  | -                                  | 9.57±0.28                          |
|                                       | Desmethylcitalopram         | 62498-67-3                                                                     | C <sub>19</sub> H <sub>19</sub> FN <sub>2</sub> O               | 310.37                                  | -                                                     | -                       | -                        | 0.14                    | -                                                                           | 1.40x10 <sup>-7</sup>                  | -                                  | 10.50±0.10                         |
| Anti-epileptic and metabolites        | Venlafaxine                 | 93413-69-5                                                                     | C <sub>17</sub> H <sub>27</sub> N <sub>1</sub> O <sub>2</sub>   | 277.41                                  | 266.7                                                 | 3.28                    | 2.318                    | 1.32                    | 2.87x10 <sup>-11</sup>                                                      | 4.92x10 <sup>-7</sup>                  | 14.84±0.20                         | 9.26±0.28                          |
|                                       | Carbamazepine               | 298-46-4                                                                       | C <sub>15</sub> H <sub>12</sub> N <sub>2</sub> O                | 236.28                                  | 17.7                                                  | 2.25                    | 2.227                    | 2.77                    | 1.08x10 <sup>-10</sup>                                                      | 5.78x10 <sup>-7</sup>                  | 13.94±0.20                         | 0.49±0.20                          |
|                                       | Carbamazepine 10,11-epoxide | 36507-30-9                                                                     | C <sub>15</sub> H <sub>12</sub> N <sub>2</sub> O <sub>2</sub>   | 252.27                                  | -                                                     | -                       | -                        | 1.97                    | -                                                                           | 2.69x10 <sup>-6</sup>                  | 13.91±0.20                         | 0.50±0.20                          |
| 10,11 dihydro 10 hydroxycarbamazepine | 29331-92-8                  | C <sub>15</sub> H <sub>14</sub> N <sub>2</sub> O <sub>2</sub>                  | 254.28                                                          | -                                       | -                                                     | -                       | 1.73                     | -                       | 3.33x10 <sup>-8</sup>                                                       | 13.75±0.20                             | 0.53±0.40                          |                                    |
| Anti-psychotic                        | Quetiapine                  | 111974-69-7                                                                    | C <sub>21</sub> H <sub>25</sub> N <sub>3</sub> O <sub>2</sub> S | 384.52                                  | 0.6                                                   | 3.17                    | 2.111                    | 2.67                    | 7.45x10 <sup>-18</sup>                                                      | 3.22x10 <sup>-13</sup>                 | 14.41±0.10                         | 6.74±0.10                          |
| Antihistamine                         | Cetirizine                  | 83881-51-0                                                                     | C <sub>21</sub> H <sub>25</sub> ClN <sub>2</sub> O <sub>3</sub> | 388.90                                  | 1.1                                                   | -0.61                   | 0.875                    | 0.69                    | 4.19x10 <sup>-17</sup>                                                      | 1.39x10 <sup>-12</sup>                 | 3.46±0.10                          | 6.71±0.10                          |
| Beta-blocker                          | Atenolol                    | 29122-68-7                                                                     | C <sub>14</sub> H <sub>22</sub> N <sub>2</sub> O <sub>3</sub>   | 266.34                                  | 685.0                                                 | -0.03                   | 0.611                    | -1.71                   | 1.37x10 <sup>-18</sup>                                                      | 3.82x10 <sup>-11</sup>                 | 13.88±0.20                         | 9.43±0.10                          |
|                                       | Metoprolol                  | 51384-51-1                                                                     | C <sub>15</sub> H <sub>25</sub> NO <sub>3</sub>                 | 267.37                                  | 4.77x10 <sup>3</sup>                                  | 1.69                    | 1.475                    | -0.38                   | 1.40x10 <sup>-13</sup>                                                      | 4.52x10 <sup>-7</sup>                  | 13.89±0.20                         | 9.43±0.10                          |
|                                       | Propranolol                 | 525-66-6                                                                       | C <sub>16</sub> H <sub>21</sub> NO <sub>2</sub>                 | 259.35                                  | 228.0                                                 | 2.60                    | 2.451                    | 0.45                    | 7.98x10 <sup>-13</sup>                                                      | 2.48x10 <sup>-8</sup>                  | 13.84±0.20                         | 9.50±0.30                          |
| Calcium channel blocker               | Diltiazem                   | 42399-41-7                                                                     | C <sub>22</sub> H <sub>26</sub> N <sub>2</sub> O <sub>4</sub> S | 414.52                                  | 12.3                                                  | 2.79                    | 2.296                    | 1.97                    | 8.61x10 <sup>-17</sup>                                                      | 4.27x10 <sup>-14</sup>                 | -                                  | 8.94±0.28                          |
| Cough suppressant                     | Pholcodine                  | 509-67-1                                                                       | C <sub>23</sub> H <sub>30</sub> N <sub>2</sub> O <sub>4</sub>   | 398.51                                  | 1.01x10 <sup>4</sup>                                  | 0.59                    | 0.731                    | -0.48                   | 3.42x10 <sup>-19</sup>                                                      | 3.44x10 <sup>-14</sup>                 | 13.40±0.20                         | 8.22±0.40                          |

Table S1. (continued)

| Micropollutant class                         | Micropollutant              | CAS No.                                         | Molecular Formula                                                            | Molecular Weight (g mol <sup>-1</sup> ) | Water Solubility (mg L <sup>-1</sup> ) <sup>[i]</sup> | Log K <sub>ow</sub> <sup>[ii]</sup> | Log K <sub>oc</sub> <sup>[iii]</sup> | Log Dow <sup>[iv]</sup> | Henry's Law Constant (atm m <sup>3</sup> mol <sup>-1</sup> ) <sup>[v]</sup> | Vapour Pressure (Torr) <sup>[vi]</sup> | pKa (Most acidic) <sup>[vii]</sup> | pKa (Most basic) <sup>[viii]</sup> |
|----------------------------------------------|-----------------------------|-------------------------------------------------|------------------------------------------------------------------------------|-----------------------------------------|-------------------------------------------------------|-------------------------------------|--------------------------------------|-------------------------|-----------------------------------------------------------------------------|----------------------------------------|------------------------------------|------------------------------------|
| Anti-diabetes                                | Metformin                   | 657-24-9                                        | C <sub>4</sub> H <sub>11</sub> N <sub>5</sub>                                | 129.17                                  | 1.00x10 <sup>6</sup>                                  | -2.64                               | -0.666                               | -6.45                   | 7.64x10 <sup>-16</sup>                                                      | 1.33                                   | -                                  | 12.27±0.10                         |
|                                              | Gliclazide                  | 21187-98-4                                      | C <sub>15</sub> H <sub>21</sub> N <sub>3</sub> O <sub>3</sub> S              | 323.41                                  | 138.4                                                 | 2.12                                | 2.205                                | 0.79                    | 7.95x10 <sup>-13</sup>                                                      | -                                      | 6.07±0.10                          | 3.89±0.20                          |
| Drug precursor and metabolite                | Ephedrine/pseudoephedrine   | 299-42-3                                        | C <sub>10</sub> H <sub>15</sub> NO                                           | 165.24                                  | 7.15x10 <sup>4</sup>                                  | 0.68                                | 1.095                                | -1.13                   | 8.65x10 <sup>-11</sup>                                                      | 8.65x10 <sup>-3</sup>                  | 13.96±0.20                         | 9.38±0.10                          |
|                                              | Norephedrine                | 492-39-7                                        | C <sub>9</sub> H <sub>13</sub> NO                                            | 151.21                                  | 1.49x10 <sup>5</sup>                                  | 0.22                                | 0.951                                | -1.40                   | 3.94x10 <sup>-11</sup>                                                      | 1.10x10 <sup>-3</sup>                  | 12.07±0.45                         | 8.47±0.10                          |
| H <sub>2</sub> receptor agonists             | Ranitidine                  | 66357-35-5                                      | C <sub>13</sub> H <sub>22</sub> N <sub>4</sub> O <sub>3</sub> S              | 314.41                                  | 2.47x10 <sup>4</sup>                                  | 0.29                                | 1.141                                | -1.56                   | 3.42x10 <sup>-15</sup>                                                      | 7.66x10 <sup>-8</sup>                  | -                                  | 8.35±0.28                          |
|                                              | Cimetidine                  | 51481-61-9                                      | C <sub>10</sub> H <sub>16</sub> N <sub>6</sub> S                             | 252.34                                  | 1.05x10 <sup>4</sup>                                  | 0.57                                | 1.850                                | -0.30                   | 9.55x10 <sup>-16</sup>                                                      | 3.13x10 <sup>-9</sup>                  | 14.13±0.10                         | 7.07±0.61                          |
| Nicotine and metabolites                     | Nicotine                    | 54-11-5                                         | C <sub>10</sub> H <sub>14</sub> N <sub>2</sub>                               | 162.24                                  | 1.00x10 <sup>6</sup>                                  | 1.00                                | 1.683                                | -2.34                   | 3.00x10 <sup>-9</sup>                                                       | 3.03x10 <sup>-2</sup>                  | -                                  | 8.00±0.50                          |
|                                              | Caffeine                    | 58-08-2                                         | C <sub>8</sub> H <sub>10</sub> N <sub>4</sub> O <sub>2</sub>                 | 194.19                                  | 2.63x10 <sup>3</sup>                                  | 0.16                                | 0.980                                | -0.55                   | 3.58x10 <sup>-11</sup>                                                      | 3.72x10 <sup>-7</sup>                  | -                                  | 0.52±0.70                          |
|                                              | Cotinine                    | 486-56-6                                        | C <sub>10</sub> H <sub>12</sub> N <sub>2</sub> O                             | 176.22                                  | 9.99x10 <sup>5</sup>                                  | 0.34                                | 1.093                                | 0.21                    | 3.33x10 <sup>-12</sup>                                                      | 4.21x10 <sup>-4</sup>                  | -                                  | 4.72±0.12                          |
| Hypertension                                 | 1,7 dimethylxantine         | 611-59-6                                        | C <sub>7</sub> H <sub>8</sub> N <sub>4</sub> O <sub>2</sub>                  | 180.17                                  | 4.14x10 <sup>3</sup>                                  | -0.39                               | 0.919                                | 0.24                    | 1.75x10 <sup>-12</sup>                                                      | -                                      | 8.50±0.50                          | 0.21±0.70                          |
|                                              | Lisinopril                  | 76547-98-3                                      | C <sub>21</sub> H <sub>31</sub> N <sub>3</sub> O <sub>5</sub>                | 405.50                                  | 8.6                                                   | -0.94                               | -0.516                               | -3.23                   | 1.89x10 <sup>-22</sup>                                                      | 1.14x10 <sup>-18</sup>                 | 2.18±0.10                          | 10.50±0.10                         |
|                                              | Temazepam                   | 846-50-4                                        | C <sub>16</sub> H <sub>13</sub> ClN <sub>2</sub> O <sub>2</sub>              | 300.75                                  | 163.9                                                 | 2.15                                | 1.678                                | 2.79                    | 1.13x10 <sup>-8</sup>                                                       | 6.33x10 <sup>-13</sup>                 | 11.66±0.40                         | 1.58±0.50                          |
| Anti-inflammatory Stimulants and metabolites | Acetaminophen               | 103-90-2                                        | C <sub>8</sub> H <sub>9</sub> NO <sub>2</sub>                                | 151.17                                  | 3.04x10 <sup>4</sup>                                  | 0.27                                | 1.321                                | 0.90                    | 6.42x10 <sup>-13</sup>                                                      | 1.43x10 <sup>-6</sup>                  | 9.86±0.13                          | 1.72±0.50                          |
|                                              | Heroin                      | 561-27-3                                        | C <sub>21</sub> H <sub>23</sub> NO <sub>5</sub>                              | 369.42                                  | 2.15x10 <sup>3</sup>                                  | 1.80                                | 1.658                                | -0.06                   | 6.15x10 <sup>-13</sup>                                                      | 7.38x10 <sup>-10</sup>                 | -                                  | 7.93±0.40                          |
|                                              | Amphetamine                 | 300-62-9                                        | C <sub>9</sub> H <sub>13</sub> N                                             | 135.21                                  | 2.80x10 <sup>4</sup>                                  | 1.76                                | 1.877                                | -1.23                   | 1.08x10 <sup>-6</sup>                                                       | 0.31                                   | -                                  | 9.94±0.10                          |
|                                              | Methamphetamine             | 537-46-2                                        | C <sub>10</sub> H <sub>15</sub> N                                            | 149.24                                  | 1.33x10 <sup>4</sup>                                  | 2.22                                | 2.027                                | -1.01                   | 2.37x10 <sup>-6</sup>                                                       | 0.15                                   | -                                  | 10.38±0.10                         |
|                                              | MDMA                        | 42542-10-9                                      | C <sub>11</sub> H <sub>15</sub> NO <sub>2</sub>                              | 193.25                                  | 7.03x10 <sup>3</sup>                                  | 2.28                                | 2.183                                | -1.38                   | 2.75x10 <sup>-9</sup>                                                       | 3.17x10 <sup>-3</sup>                  | -                                  | 10.32±0.10                         |
|                                              | MDA                         | 101-77-9                                        | C <sub>13</sub> H <sub>14</sub> N <sub>2</sub>                               | 198.27                                  | 1.96x10 <sup>3</sup>                                  | 2.18                                | 1.761                                | -1.61                   | 1.58x10 <sup>-11</sup>                                                      | 1.52x10 <sup>-6</sup>                  | -                                  | 5.32±0.25                          |
|                                              | 6-acetylmorphine            | 2784-73-8                                       | C <sub>19</sub> H <sub>21</sub> NO <sub>4</sub>                              | 327.37                                  | -                                                     | -                                   | -                                    | -0.22                   | -                                                                           | 1.83x10 <sup>-9</sup>                  | 9.41±0.40                          | 8.03±0.40                          |
|                                              | Cocaine                     | 50-36-2                                         | C <sub>17</sub> H <sub>21</sub> NO <sub>4</sub>                              | 303.36                                  | 1.30x10 <sup>3</sup>                                  | 2.17                                | 2.001                                | 0.92                    | 4.24x10 <sup>-11</sup>                                                      | 1.87x10 <sup>-6</sup>                  | -                                  | 8.97±0.60                          |
|                                              | Benzoylcegonine             | 519-09-5                                        | C <sub>16</sub> H <sub>19</sub> NO <sub>4</sub>                              | 289.33                                  | 1.61x10 <sup>3</sup>                                  | -1.32                               | -0.705                               | -0.60                   | 1.03x10 <sup>-13</sup>                                                      | 1.32x10 <sup>-8</sup>                  | 3.35±0.40                          | 10.83±0.40                         |
|                                              | Anhydrocegonine methylester | 43021-26-7                                      | C <sub>10</sub> H <sub>15</sub> NO <sub>2</sub>                              | 181.23                                  | -                                                     | -                                   | -                                    | 0.21                    | -                                                                           | 2.19x10 <sup>-2</sup>                  | -                                  | 7.97±0.40                          |
| Cocethylene                                  | 529-38-4                    | C <sub>18</sub> H <sub>23</sub> NO <sub>4</sub> | 317.38                                                                       | -                                       | -                                                     | -                                   | 1.35                                 | -                       | 6.80x10 <sup>-7</sup>                                                       | -                                      | 9.04±0.60                          |                                    |
| Mephedrone                                   | 1189805-46-6                | C <sub>11</sub> H <sub>15</sub> NO              | 177.24                                                                       | -                                       | -                                                     | -                                   | 1.47                                 | -                       | 3.84x10 <sup>-3</sup>                                                       | -                                      | 7.41±0.10                          |                                    |
| UV filter                                    | 3-benzophenone              | 131-57-7                                        | C <sub>14</sub> H <sub>12</sub> O <sub>3</sub>                               | 228.25                                  | 68.6                                                  | 3.52                                | 3.440                                | 3.06                    | 1.50x10 <sup>-8</sup>                                                       | 5.26x10 <sup>-6</sup>                  | 7.56±0.35                          | -                                  |
| Veterinary                                   | Tylosin                     | 1401-69-0                                       | C <sub>46</sub> H <sub>77</sub> NO <sub>17</sub>                             | 916.12                                  | 0.5                                                   | 1.05                                | 0.205                                | 2.14                    | 5.77x10 <sup>-38</sup>                                                      | 0.00                                   | 13.06±0.70                         | 7.39±0.70                          |
| X-ray contrast media                         | Iopromide                   | 73334-07-3                                      | C <sub>18</sub> H <sub>24</sub> I <sub>3</sub> N <sub>3</sub> O <sub>8</sub> | 791.12                                  | 23.8                                                  | -2.49                               | -1.672                               | -0.44                   | 1.00x10 <sup>-28</sup>                                                      | 5.00x10 <sup>-30</sup>                 | 10.62±0.70                         | -2.60±0.70                         |

[i] As calculated by EPI Suite at 25°C<sup>1</sup>[ii] As calculated by EPI Suite (KOWWIN v1.68 estimate)<sup>1</sup>[iii] As calculated by EPI Suite based on Log Know<sup>1</sup>[iv] As calculated by Marvin Beans at pH 7.5<sup>1</sup>[v] As calculated by EPI Suite based on Bond SAR method<sup>1</sup>[vi] As stated on Scifinder calculated using Advanced Chemistry Development (ACD/Labs) Software v11.02 (© 1994-2015 ACD/Labs)<sup>1</sup>[vii] As stated on Scifinder calculated using Advanced Chemistry Development (ACD/Labs) Software v11.02 (© 1994-2015 ACD/Labs) at 25°C<sup>1</sup>

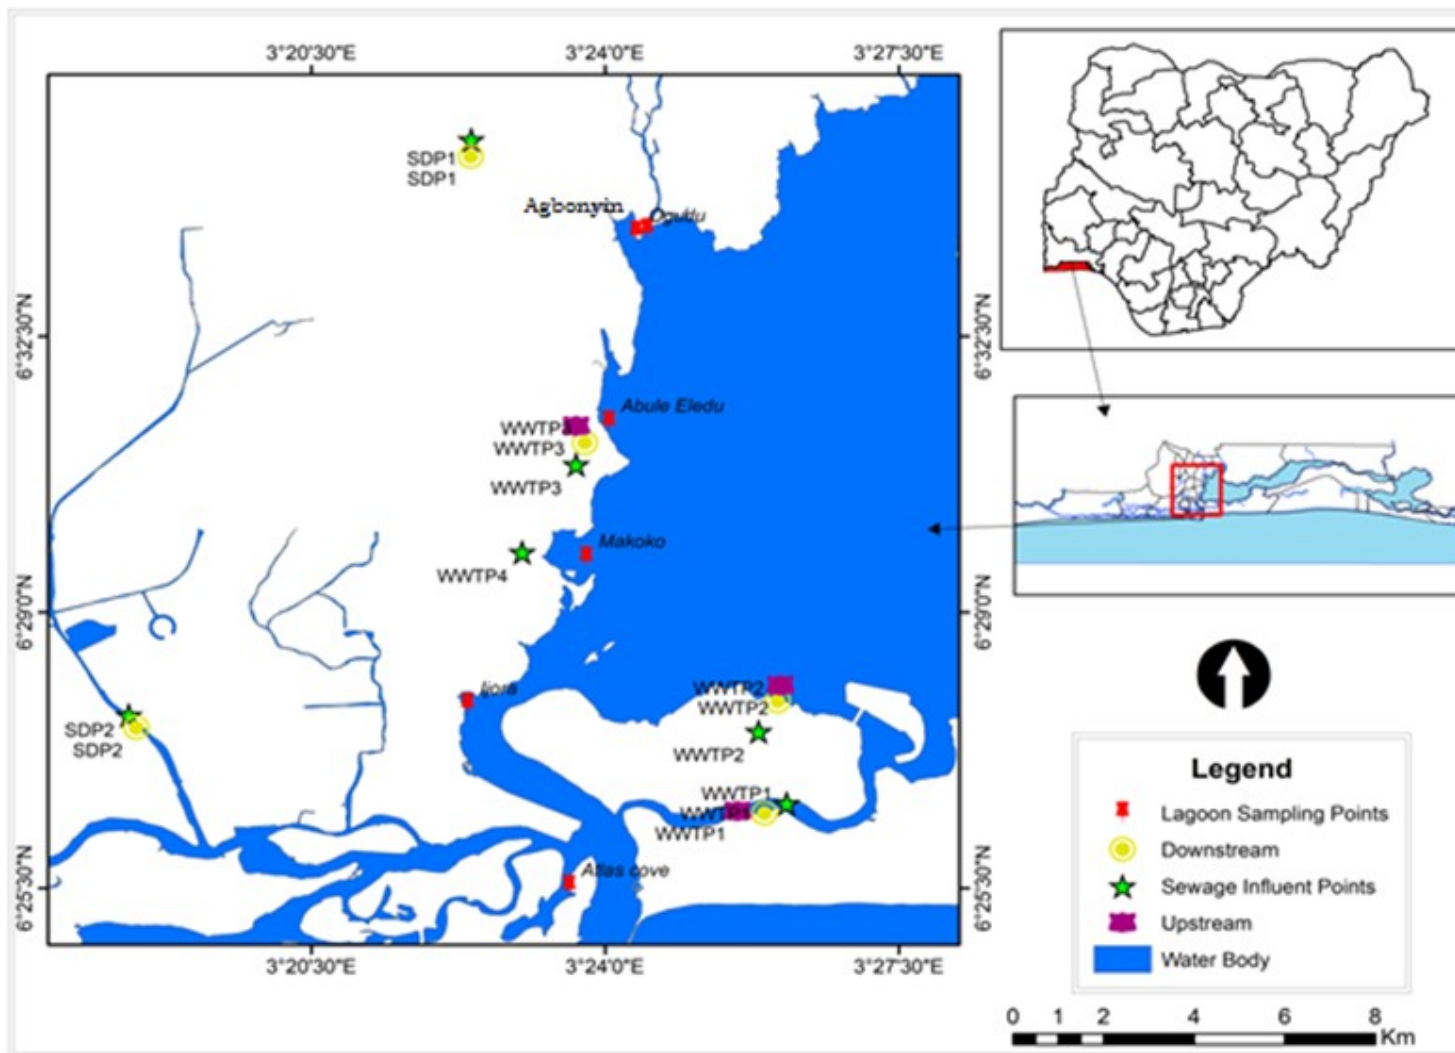

Figure S1. Sample collection points for wastewater and surface water

**Table S2.** Instrument details including chromatographic retention time and mass spectrometry parameters used in the determination of target analytes

| Micropollutant class             | Micropollutant                        | $t_R$ (min)    | Precursor ion (m/z) | Product ion 1 (m/z) | CV (V) | CE (eV) | Product ion 2 (m/z) | CV (V) | CE (eV) | Ion ratio <sup>a</sup> | Internal Standard                                      |
|----------------------------------|---------------------------------------|----------------|---------------------|---------------------|--------|---------|---------------------|--------|---------|------------------------|--------------------------------------------------------|
| Anaesthetic and metabolite       | Ketamine                              | 10.59          | 238.1               | 125.0               | 31     | 27      | 220.1               | 31     | 15      | 2.93 ± 0.04            | Ketamine-d <sub>4</sub>                                |
|                                  | Norketamine                           | 11.08          | 224.0               | 207.1               | 23     | 12      | 125.0               | 23     | 27      | 1.00 ± 0.02            | Norketamine-d <sub>4</sub>                             |
| Analgesics and metabolites       | Morphine                              | 3.46           | 286.2               | 165.1               | 53     | 38      | 152.1               | 53     | 56      | 0.98 ± 0.04            | Morphine-d <sub>3</sub>                                |
|                                  | Dihydromorphine                       | 3.30           | 288.2               | 185.0               | 28     | 42      | 213.0               | 28     | 32      | 2.82 ± 0.14            | Morphine-d <sub>3</sub>                                |
|                                  | Normorphine                           | 3.41           | 272.1               | 165.0               | 45     | 43      | 152.1               | 45     | 49      | 1.16 ± 0.05            | Morphine-d <sub>3</sub>                                |
|                                  | Methadone                             | 17.59          | 310.2               | 265.1               | 31     | 15      | 105.1               | 31     | 28      | 1.50 ± 0.05            | Methadone-d <sub>9</sub>                               |
|                                  | Codeine                               | 6.05           | 300.2               | 215.1               | 49     | 25      | 152.1               | 49     | 57      | 1.17 ± 0.04            | Codeine-d <sub>6</sub>                                 |
|                                  | Dihydrocodeine                        | 5.47           | 302.1               | 199.1               | 53     | 33      | 128.1               | 53     | 60      | 1.91 ± 0.05            | Codeine-d <sub>6</sub>                                 |
|                                  | Norcodeine                            | 6.45           | 286.1               | 165.1               | 46     | 40      | 268.2               | 46     | 20      | 1.11 ± 0.04            | Codeine-d <sub>6</sub>                                 |
|                                  | Tramadol                              | 10.97          | 264.0               | 58.0                | 28     | 45      | 120.7               | 28     | 46      | 270 ± 21.4             | Metoprolol-d <sub>7</sub>                              |
|                                  | N-desmethyltramadol                   | 11.88          | 250.1               | 44.0                | 25     | 12      | 232.1               | 25     | 8       | 38.6 ± 0.06            | Cocaine-d <sub>3</sub>                                 |
|                                  | O-desmethyltramadol                   | 8.29           | 250.2               | 58.0                | 30     | 18      | 232.1               | 30     | 10      | 181 ± 6.40             | Cotinine-d <sub>3</sub>                                |
|                                  | Antibacterial/antibiotics             | Clarithromycin | 18.87               | 748.5               | 158.1  | 40      | 31                  | 590.4  | 40      | 20                     | 3.71 ± 0.03                                            |
| Azithromycin                     |                                       | 13.95          | 749.5               | 116.1               | 60     | 54      | 83.1                | 0      | 60      | 0.95 ± 0.02            | EDDP-d <sub>3</sub>                                    |
| Trimethoprim                     |                                       | 8.43           | 291.2               | 230.2               | 26     | 26      | 123.1               | 26     | 36      | 1.07 ± 0.03            | Methamphetamine-d <sub>5</sub>                         |
| Sulfamethoxazole                 |                                       | 9.56           | 254.1               | 92.2                | 36     | 30      | 156.1               | 36     | 20      | 1.44 ± 0.03            | Benzoylcegonine-d <sub>8</sub>                         |
| Azathioprine                     |                                       | 7.75           | 278.0               | 142.0               | 28     | 13      | 85.0                | 28     | 20      | 5.49 ± 0.17            | Cotinine-d <sub>3</sub>                                |
| Anti-cancer                      | Methotrexate                          | 7.89           | 455.1               | 308.1               | 40     | 20      | 175.1               | 40     | 35      | 1.93 ± 0.50            | Amphetamine-d <sub>5</sub>                             |
|                                  | Tamoxifen                             | 22.39          | 372.2               | 72.0                | 50     | 25      | 129.0               | 50     | 28      | 30.6 ± 0.91            | Tamoxifen <sup>13</sup> C <sub>2</sub> <sup>15</sup> N |
|                                  | Ifosfamide                            | 12.69          | 261.0               | 92.0                | 40     | 28      | 154.0               | 40     | 22      | 1.89 ± 0.03            | Metoprolol-d <sub>7</sub>                              |
| Anti-depressants and metabolites | Fluoxetine                            | 18.35          | 310.2               | 44.1                | 34     | 10      | 148.1               | 34     | 10      | 14.9 ± 0.54            | Fluoxetine-d <sub>5</sub>                              |
|                                  | Norfluoxetine                         | 18.42          | 296.1               | 134.1               | 18     | 6       | -                   | -      | -       | -                      | Fluoxetine-d <sub>5</sub>                              |
|                                  | Sertraline                            | 19.22          | 306.0               | 159.0               | 23     | 27      | 275.0               | 23     | 10      | 1.26 ± 0.02            | Sertraline-d <sub>3</sub>                              |
|                                  | Citalopram                            | 15.06          | 325.1               | 262.1               | 46     | 18      | 109.9               | 46     | 26      | 21.8 ± 3.45            | Citalopram-d <sub>6</sub>                              |
|                                  | Desmethylcitalopram                   | 15.17          | 311.4               | 109.0               | 46     | 27      | 262.0               | 46     | 18      | 3.58 ± 0.11            | Citalopram-d <sub>6</sub>                              |
|                                  | Venlafaxine                           | 14.14          | 278.2               | 58.1                | 27     | 40      | 260.1               | 27     | 12      | 1.78 ± 0.02            | Metoprolol-d <sub>7</sub>                              |
| Anti-epileptic and metabolites   | Carbamazepine                         | 16.15          | 237.0               | 194.1               | 40     | 20      | 179.1               | 40     | 38      | 10.6 ± 0.15            | Carbamazepine <sup>13</sup> C <sub>6</sub>             |
|                                  | Carbamazepine 10,11-epoxide           | 13.47          | 253.1               | 180.1               | 39     | 25      | 210.1               | 39     | 12      | 1.96 ± 0.04            | Carbamazepine <sup>13</sup> C <sub>6</sub>             |
|                                  | 10,11 dihydro 10 hydroxycarbamazepine | 13.49          | 255.1               | 194.1               | 20     | 20      | 179.1               | 20     | 40      | 9.75 ± 0.29            | Carbamazepine <sup>13</sup> C <sub>6</sub>             |
| Anti-psychotic                   | Quetiapine                            | 17.87          | 384.1               | 253.1               | 50     | 21      | 221.1               | 50     | 40      | 1.97 ± 0.04            | Quetiapine-d <sub>8</sub>                              |
| Antihistamine                    | Cetirizine                            | 18.68          | 389.1               | 201.0               | 32     | 21      | 166.0               | 32     | 40      | 2.51 ± 0.05            | Temazepam-d <sub>5</sub>                               |
| Beta-blocker                     | Atenolol                              | 4.32           | 267.3               | 145.1               | 38     | 30      | 190.1               | 38     | 16      | 1.61 ± 0.07            | Atenolol-d <sub>7</sub>                                |
|                                  | Metoprolol                            | 11.17          | 268.3               | 116.1               | 42     | 20      | 121.1               | 42     | 22      | 2.36 ± 0.04            | Metoprolol-d <sub>7</sub>                              |
|                                  | Propranolol                           | 15.14          | 260.2               | 183.1               | 42     | 18      | 116.1               | 42     | 16      | 1.88 ± 0.09            | Propranolol-d <sub>7</sub>                             |
| Calcium channel blocker          | Diltiazem                             | 16.72          | 415.0               | 178.0               | 40     | 25      | 310.1               | 40     | 25      | 23.4 ± 1.30            | Carbamazepine <sup>13</sup> C <sub>6</sub>             |
| Cough suppressant                | Pholcodine                            | 3.70           | 399.2               | 381.2               | 55     | 25      | 100.1               | 55     | 37      | 3.00 ± 0.43            | Atenolol-d <sub>7</sub>                                |

**Table S2. (continued)**

| Micropollutant class             | Micropollutant              | $t_R$ (min) | Precursor ion (m/z) | Product ion 1 (m/z) | CV (V) | CE (eV) | Product ion 2 (m/z) | CV (V) | CE (eV) | Ion ratio <sup>a</sup> | Internal Standard                  |
|----------------------------------|-----------------------------|-------------|---------------------|---------------------|--------|---------|---------------------|--------|---------|------------------------|------------------------------------|
| Anti-diabetes                    | Metformin                   | 2.84        | 130.0               | 60.0                | 30     | 15      | 71.0                | 30     | 20      | 1.89 ± 0.02            | Metformin-d <sub>6</sub>           |
|                                  | Gliclazide                  | 17.80       | 324.1               | 127.0               | 41     | 20      | 110.0               | 41     | 20      | 0.98 ± 0.04            | Quetiapine-d <sub>8</sub>          |
| Drug precursor and metabolite    | Ephedrine/pseudoephedrine   | 7.22        | 166.1               | 148.1               | 23     | 12      | 133.1               | 23     | 21      | 6.58 ± 0.12            | 1S,2R-(+) Ephedrine-d <sub>3</sub> |
|                                  | Norephedrine                | 6.34        | 152.2               | 134.1               | 23     | 10      | 117.1               | 23     | 16      | 2.99 ± 0.06            | 1S,2R-(+) Ephedrine-d <sub>3</sub> |
| H <sub>2</sub> receptor agonists | Ranitidine                  | 4.62        | 315.9               | 176.0               | 26     | 17      | 123.9               | 26     | 24      | 8.44 ± 0.50            | Atenolol-d <sub>7</sub>            |
|                                  | Cimetidine                  | 5.32        | 252.9               | 159.4               | 22     | 16      | 211.2               | 22     | 10      | 9.02 ± 0.40            | Acetaminophen-d <sub>4</sub>       |
| Nicotine and metabolites         | Nicotine                    | 3.34        | 163.1               | 130.0               | 37     | 20      | 117.0               | 37     | 20      | 1.37 ± 0.02            | Atenolol-d <sub>7</sub>            |
|                                  | Caffeine                    | 8.29        | 195.1               | 138.0               | 38     | 15      | 110.0               | 38     | 23      | 2.56 ± 0.05            | Cotinine-d <sub>3</sub>            |
|                                  | Cotinine                    | 7.22        | 177.1               | 80.0                | 34     | 21      | 98.1                | 34     | 22      | 2.91 ± 0.05            | Cotinine-d <sub>3</sub>            |
|                                  | 1,7 dimethylxantine         | 6.78        | 181.0               | 124.1               | 54     | 21      | -                   | -      | -       | -                      | Cotinine-d <sub>3</sub>            |
| Hypertension                     | Lisinopril                  | 7.14        | 406.2               | 84.0                | 38     | 27      | 246.1               | 38     | 22      | 9.42 ± 0.30            | Amphetamine-d <sub>5</sub>         |
|                                  | Temazepam                   | 18.16       | 301.1               | 255.1               | 37     | 21      | 283.1               | 37     | 14      | 2.21 ± 0.05            | Temazepam-d <sub>5</sub>           |
| Anti-inflammatory                | Acetaminophen               | 5.11        | 151.9               | 110.0               | 26     | 16      | 92.9                | 26     | 24      | 5.54 ± 0.13            | Acetaminophen-d <sub>4</sub>       |
| Stimulants and metabolites       | Heroin                      | 10.85       | 370.2               | 165.1               | 51     | 50      | 268.1               | 51     | 29      | 1.41 ± 0.02            | Heroin-d <sub>9</sub>              |
|                                  | Amphetamine                 | 8.39        | 136.2               | 91.1                | 18     | 16      | 119.1               | 18     | 8       | 1.20 ± 0.04            | Amphetamine-d <sub>5</sub>         |
|                                  | Methamphetamine             | 8.51        | 150.2               | 91.1                | 24     | 19      | 119.1               | 24     | 10      | 1.73 ± 0.03            | Methamphetamine-d <sub>5</sub>     |
|                                  | MDMA                        | 8.62        | 194.1               | 163.1               | 24     | 13      | 105.1               | 24     | 24      | 2.34 ± 0.03            | MDMA-d <sub>5</sub>                |
|                                  | MDA                         | 8.59        | 180.0               | 163.1               | 21     | 11      | 105.1               | 21     | 22      | 2.73 ± 0.06            | MDA-d <sub>5</sub>                 |
|                                  | 6-acetylmorphine            | 7.65        | 328.1               | 165.1               | 52     | 39      | 211.1               | 52     | 26      | 1.46 ± 0.04            | Cotinine-d <sub>3</sub>            |
|                                  | Cocaine                     | 11.32       | 304.2               | 182.1               | 40     | 20      | 82.1                | 40     | 31      | 2.75 ± 0.09            | Cocaine-d <sub>3</sub>             |
|                                  | Benzoylcegonine             | 9.68        | 290.2               | 168.1               | 38     | 19      | 105.1               | 38     | 30      | 1.95 ± 0.03            | Benzoylcegonine-d <sub>8</sub>     |
|                                  | Anhydroecgonine methylester | 3.45        | 182.1               | 118.0               | 39     | 23      | 122.1               | 37     | 20      | 1.23 ± 0.03            | Atenolol-d <sub>7</sub>            |
|                                  | Cocaethylene                | 12.91       | 318.2               | 196.2               | 38     | 20      | 82.1                | 38     | 30      | 1.90 ± 0.05            | Cocaethylene-d <sub>3</sub>        |
|                                  | Mephedrone                  | 9.79        | 178.1               | 160.1               | 10     | 12      | 145.0               | 10     | 22      | 1.55 ± 0.06            | Mephedrone-d <sub>3</sub>          |
| UV filter                        | 3-benzophenone              | 21.23       | 229.0               | 151.0               | 35     | 18      | 105.0               | 35     | 20      | 1.58 ± 0.04            | Methadone-d <sub>9</sub>           |
| Veterinary                       | Tylosin                     | 17.25       | 916.5               | 174.2               | 80     | 45      | 101.0               | 80     | 56      | 1.88 ± 0.07            | Methadone-d <sub>9</sub>           |
| X-ray contrast media             | Iopromide                   | 4.89        | 792.0               | 573.0               | 46     | 25      | 558.9               | 46     | 32      | 1.45 ± 0.06            | Acetaminophen-d <sub>4</sub>       |

$t_R$ , retention time; CV, cone voltage; CE, collision energy

<sup>a</sup>MRM ratio: Product ion 1/Product ion 2 ratio average over the entire calibration range

**Table S3.** Instrument performance data of target analytes

| Micropollutant class                | Micropollutant                        | Corresponding<br>Internal standard | Linearity                    |       | IDL <sub>S/N</sub><br>(ng mL <sup>-1</sup> ) | IQL <sub>S/N</sub><br>(ng mL <sup>-1</sup> ) | Intra-day instrument performance <sup>a</sup> |              | Inter-day instrument performance <sup>a</sup> |              |
|-------------------------------------|---------------------------------------|------------------------------------|------------------------------|-------|----------------------------------------------|----------------------------------------------|-----------------------------------------------|--------------|-----------------------------------------------|--------------|
|                                     |                                       |                                    | Range (ng mL <sup>-1</sup> ) | r2    |                                              |                                              | Precision (%)                                 | Accuracy (%) | Precision (%)                                 | Accuracy (%) |
| Anaesthetic and metabolite          | Ketamine                              | Ketamine D4                        | 0.05-500                     | 0.999 | 0.01                                         | 0.05                                         | 1.3                                           | 93.6         | 1.8                                           | 92.5         |
|                                     | Norketamine                           | Norketamine D4                     | 0.10-500                     | 0.999 | 0.03                                         | 0.1                                          | 3.2                                           | 94           | 1.8                                           | 94.1         |
| Analgesics and metabolites          | Morphine                              | Morphine D3                        | 1.00-500                     | 0.997 | 0.3                                          | 1                                            | 2.5                                           | 97.5         | 2.9                                           | 99.1         |
|                                     | Dihydromorphine                       | Morphine-D3                        | 0.05-500                     | 0.998 | 0.01                                         | 0.05                                         | 2.7                                           | 108.5        | 4.4                                           | 106          |
|                                     | Normorphine                           | Morphine-D3                        | 1.00-500                     | 0.997 | 0.3                                          | 1                                            | 2.2                                           | 99.8         | 1.5                                           | 101          |
|                                     | Methadone                             | Methadone D9                       | 0.05-400                     | 0.998 | 0.01                                         | 0.05                                         | 1.4                                           | 100.2        | 1.5                                           | 98.7         |
|                                     | Codeine                               | Codeine D6                         | 0.50-500                     | 0.999 | 0.1                                          | 0.5                                          | 4                                             | 95.1         | 2                                             | 93.5         |
|                                     | Dihydrocodeine                        | Codeine D6                         | 0.10-500                     | 0.999 | 0.03                                         | 0.1                                          | 2.1                                           | 94.6         | 1.6                                           | 94.2         |
|                                     | Norcodeine                            | Codeine D6                         | 1.00-500                     | 0.999 | 0.3                                          | 1                                            | 4.8                                           | 98.6         | 2.8                                           | 98.5         |
|                                     | Tramadol                              | Metoprolol D7                      | 1.00-500                     | 0.999 | 0.01                                         | 1                                            | 1.9                                           | 98.4         | 1.6                                           | 100.1        |
|                                     | N-desmethyltramadol                   | Cocaine-D3                         | 0.50-500                     | 0.999 | 0.01                                         | 0.5                                          | 2.2                                           | 94.4         | 2.5                                           | 92.5         |
| Antibacterial/<br>antibiotics       | O-desmethyltramadol                   | MDA-D5                             | 1.00-400                     | 0.997 | 0.01                                         | 1                                            | 4.9                                           | 98.5         | 3.3                                           | 95.3         |
|                                     | Clarithromycin                        | Methadone D9                       | 0.06-500                     | 1     | 0.01                                         | 0.06                                         | 2.4                                           | 101.8        | 2.6                                           | 99.8         |
|                                     | Azithromycin                          | EDDP D3                            | 0.11-500                     | 0.999 | 0.03                                         | 0.11                                         | 2.1                                           | 98.5         | 3.8                                           | 95           |
| Anti-cancer                         | Trimethoprim                          | Methamphetamine D5                 | 0.10-500                     | 0.999 | 0.03                                         | 0.1                                          | 2.2                                           | 99.5         | 3                                             | 96.9         |
|                                     | Sulfamethoxazole                      | Benzoylcegonine D8                 | 0.10-500                     | 0.999 | 0.03                                         | 0.1                                          | 2.4                                           | 96           | 3.5                                           | 95.1         |
|                                     | Azathioprine                          | Cotinine D3                        | 0.10-500                     | 0.998 | 0.03                                         | 0.1                                          | 13.9                                          | 97.4         | 7.6                                           | 97.5         |
|                                     | Methotrexate                          | Amphetamine D5                     | 0.92-500                     | 0.996 | 0.28                                         | 0.92                                         | 4.1                                           | 112.2        | 8.7                                           | 108          |
|                                     | Tamoxifen                             | Tamoxifen 13C2 15N                 | 0.03-1000                    | 0.998 | 0.01                                         | 0.03                                         | 2.4                                           | 96.8         | 4                                             | 96           |
| Anti-depressants and<br>metabolites | Ifosfamide                            | Metoprolol D7                      | 0.05-500                     | 0.999 | 0.01                                         | 0.05                                         | 2.7                                           | 95.3         | 2.4                                           | 93.6         |
|                                     | Fluoxetine                            | Fluoxetine D5                      | 0.05-1000                    | 0.999 | 0.01                                         | 0.05                                         | 1.8                                           | 98.3         | 1.7                                           | 96.8         |
|                                     | Norfluoxetine                         | Fluoxetine D5                      | 0.05-500                     | 0.998 | 0.01                                         | 0.05                                         | 3.1                                           | 103.1        | 1.5                                           | 102.7        |
|                                     | Sertraline                            | Sertraline D3                      | 0.05-500                     | 1     | 0.01                                         | 0.05                                         | 1.7                                           | 95.7         | 1.6                                           | 95.3         |
|                                     | Citalopram                            | Citalopram D6                      | 0.50-500                     | 0.999 | 0.05                                         | 0.5                                          | 2.6                                           | 101.8        | 0.7                                           | 101.2        |
|                                     | Desmethylcitalopram                   | Citalopram D6                      | 0.05-500                     | 0.999 | 0.01                                         | 0.05                                         | 3                                             | 103.4        | 1.8                                           | 103          |
|                                     | Venlafaxine                           | Metoprolol D7                      | 0.04-500                     | 1     | 0.01                                         | 0.04                                         | 1.7                                           | 90.5         | 2.5                                           | 91.2         |
| Anti-epileptic and<br>metabolites   | Carbamazepine                         | Carbamazepine 13C6                 | 0.05-500                     | 1     | 0.01                                         | 0.05                                         | 1.6                                           | 92.7         | 2                                             | 91.7         |
|                                     | Carbamazepine 10,11-epoxide           | Carbamazepine 13C6                 | 0.10-500                     | 0.998 | 0.03                                         | 0.1                                          | 2.1                                           | 89.9         | 1.6                                           | 88.9         |
|                                     | 10,11-Dihydro-10-hydroxycarbamazepine | Carbamazepine 13C6                 | 0.50-500                     | 0.999 | 0.05                                         | 0.5                                          | 5.6                                           | 93.8         | 2.8                                           | 92.2         |
| Anti-psychotic                      | Quetiapine                            | Quetiapine D8                      | 0.05-500                     | 0.999 | 0.01                                         | 0.05                                         | 1.2                                           | 96.4         | 1.4                                           | 95.3         |
| Antihistamine                       | Cetirizine                            | Temazepam D5                       | 0.08-500                     | 1     | 0.02                                         | 0.08                                         | 1.3                                           | 100.8        | 1.3                                           | 100.5        |
| Beta-blocker                        | Atenolol                              | Atenolol D5                        | 0.10-500                     | 1     | 0.03                                         | 0.1                                          | 2.3                                           | 96.8         | 2.1                                           | 95.3         |
|                                     | Metoprolol                            | Metoprolol D7                      | 0.05-500                     | 0.999 | 0.01                                         | 0.05                                         | 2                                             | 96.1         | 1.3                                           | 96.8         |
|                                     | Propranolol                           | Propranolol D7                     | 0.09-500                     | 0.999 | 0.03                                         | 0.09                                         | 1                                             | 106.2        | 2                                             | 105.4        |
| Calcium channel blocker             | Diltiazem                             | Carbamazepine 13C6                 | 0.10-500                     | 0.999 | 0.01                                         | 0.1                                          | 2.3                                           | 93.6         | 2.3                                           | 92.7         |
| Cough suppressant                   | Pholcodine                            | Atenolol D7                        | 1.14-500                     | 0.994 | 0.35                                         | 1.14                                         | 3.3                                           | 99.2         | 4.7                                           | 99.5         |

**Table S3.** (continued)

| Micro-pollutant class            | Micro-pollutant             | Corresponding<br>Internal standard | Linearity                    |          | IDL <sub>S/N</sub><br>(ng mL <sup>-1</sup> ) | IQL <sub>S/N</sub><br>(ng mL <sup>-1</sup> ) | Intra-day instrument performance <sup>a</sup> |              | Inter-day instrument performance <sup>a</sup> |              |       |
|----------------------------------|-----------------------------|------------------------------------|------------------------------|----------|----------------------------------------------|----------------------------------------------|-----------------------------------------------|--------------|-----------------------------------------------|--------------|-------|
|                                  |                             |                                    | Range (ng mL <sup>-1</sup> ) | r2       |                                              |                                              | Precision (%)                                 | Accuracy (%) | Precision (%)                                 | Accuracy (%) |       |
| Drug precursor and metabolite    | Gliclazide                  | Carbamazepine 13C6                 | 0.05-500                     | 0.998    | 0.01                                         | 0.05                                         | 2.8                                           | 95.3         | 2.1                                           | 93.2         |       |
|                                  | Ephedrine/pseudoephedrine   | 1S,2R-(+) Ephedrine D3             | 0.10-500                     | 1        | 0.03                                         | 0.1                                          | 3.4                                           | 97.3         | 4.1                                           | 94           |       |
|                                  |                             | Norephedrine                       | 1S,2R-(+) Ephedrine D3       | 0.50-500 | 0.999                                        | 0.01                                         | 0.5                                           | 5.1          | 95.2                                          | 4.3          | 96.3  |
| H <sub>2</sub> receptor agonists | Ranitidine                  | Cotinine D3                        | 5.17-500                     | 0.998    | 1.03                                         | 5.17                                         | 9.7                                           | 97.5         | 2.5                                           | 100.1        |       |
|                                  | Cimetidine                  | Codeine D6                         | 0.52-500                     | 0.998    | 0.1                                          | 0.52                                         | 9                                             | 99.3         | 4.2                                           | 104.1        |       |
| Nicotine and metabolites         | Nicotine                    | Codeine D6                         | 1.00-500                     | 0.996    | 0.3                                          | 1                                            | 2.4                                           | 98.4         | 1.2                                           | 98.3         |       |
| Hypertension                     | Caffeine                    | Cotinine D3                        | 0.50-500                     | 0.999    | 0.1                                          | 0.5                                          | 2.8                                           | 100.4        | 1.7                                           | 99.6         |       |
|                                  | Cotinine                    | Cotinine D3                        | 0.05-500                     | 0.999    | 0.01                                         | 0.05                                         | 1.5                                           | 98.8         | 1.5                                           | 98.4         |       |
|                                  | 1,7 dimethylxantine         | Cotinine D3                        | 1.00-500                     | 0.999    | 0.3                                          | 1                                            | 9.9                                           | 94.9         | 6                                             | 94.3         |       |
|                                  | Lisinopril                  | Amphetamine D5                     | 0.93-400                     | 0.995    | 0.3                                          | 1                                            | 7.2                                           | 95.2         | 2.2                                           | 97.2         |       |
|                                  | Temazepam                   | Temazepam D5                       | 0.05-500                     | 0.999    | 0.01                                         | 0.05                                         | 1.6                                           | 97.9         | 1                                             | 97           |       |
| Anti-inflammatory                | Acetaminophen               | Acetaminophen D4                   | 0.54-500                     | 0.999    | 0.11                                         | 0.54                                         | 2.6                                           | 99           | 1.6                                           | 97.4         |       |
| Stimulants and metabolites       | Heroin                      | Heroin D9                          | 0.50-500                     | 0.999    | 0.1                                          | 0.5                                          | 1.8                                           | 99.3         | 1.9                                           | 98.2         |       |
|                                  | Amphetamine                 | Amphetamine D5                     | 0.10-500                     | 0.999    | 0.03                                         | 0.1                                          | 1.6                                           | 100.7        | 4.4                                           | 100.8        |       |
|                                  | Methamphetamine             | Methamphetamine D5                 | 0.10-500                     | 0.999    | 0.03                                         | 0.1                                          | 1.3                                           | 101.1        | 2.2                                           | 101          |       |
|                                  |                             | MDMA                               | MDMA D5                      | 0.05-500 | 1                                            | 0.01                                         | 0.05                                          | 1.7          | 99.8                                          | 1.3          | 99.2  |
|                                  | MDA                         | MDA D5                             | 0.10-500                     | 0.999    | 0.03                                         | 0.1                                          | 0.7                                           | 100          | 1.1                                           | 98.4         |       |
|                                  | 6-acetylmorphine            | Cotinine D3                        | 0.10-500                     | 0.998    | 0.03                                         | 0.1                                          | 5.1                                           | 100.1        | 6.1                                           | 95.3         |       |
|                                  | Cocaine                     | Cocaine D3                         | 0.05-500                     | 1        | 0.01                                         | 0.05                                         | 1.5                                           | 99           | 2.2                                           | 97.2         |       |
|                                  | Benzoylcegonine             | Benzoylcegonine D8                 | 0.05-500                     | 0.998    | 0.01                                         | 0.05                                         | 0.9                                           | 103.2        | 2.4                                           | 103.4        |       |
|                                  | Anhydrocegonine methylester | Acetaminophen D4                   | 0.50-500                     | 0.997    | 0.1                                          | 0.5                                          | 2.4                                           | 98.7         | 2.3                                           | 101.1        |       |
|                                  | Cocaethylene                | Cocaethylene D3                    | 0.05-500                     | 1        | 0.01                                         | 0.05                                         | 1.7                                           | 94.7         | 2.8                                           | 95.1         |       |
|                                  | Mephedrone                  | Mephedrone D3                      | 0.05-500                     | 0.998    | 0.01                                         | 0.05                                         | 2.9                                           | 85.7         | 1.8                                           | 87.1         |       |
|                                  | UV filter                   | 3-benzophenone                     | Methadone D9                 | 0.05-400 | 0.99                                         | 0.01                                         | 0.05                                          | 4.5          | 86.8                                          | 3.2          | 84.9  |
|                                  | Veterinary                  | Tylosin                            | Methadone D9                 | 0.56-500 | 0.997                                        | 0.11                                         | 0.56                                          | 4            | 100.2                                         | 2.2          | 99.5  |
|                                  | X-ray contrast media        | Iopromide                          | Atenolol D7                  | 5.79-500 | 0.99                                         | 1.16                                         | 5.79                                          | 12           | 105.4                                         | 5            | 101.2 |

<sup>a</sup>Instrument performance was determined at concentration 10, 100, 500 ng mL<sup>-1</sup>

IDL, Instrument detection limit; IQL, Instrument quantification limit; S/N, signal to noise ratio



**Table S4.** Absolute and corrected recoveries in matrices sampled

| Micropollutant class             | Micropollutants                        | Influent       |              | Effluent     |              | Surface water |              |       |
|----------------------------------|----------------------------------------|----------------|--------------|--------------|--------------|---------------|--------------|-------|
|                                  |                                        | Absolute       | Corrected    | Absolute     | Corrected    | Absolute      | Corrected    |       |
|                                  |                                        | Recovery (%)   | Recovery (%) | Recovery (%) | Recovery (%) | Recovery (%)  | Recovery (%) |       |
| Anaesthetic and metabolite       | Ketamine                               | 41.7           | 111.6        | 53.8         | 115.6        | 68.2          | 107.7        |       |
| Analgesics and metabolites       | Norketamine                            | 42.2           | 98.9         | 53.9         | 108.6        | 65.7          | 103.2        |       |
|                                  | Morphine                               | 34.2           | 93.9         | 47.8         | 109.8        | 57.1          | 112.5        |       |
|                                  | Dihydromorphine                        | 19.9           | 95.7         | 31.4         | 96.2         | 45.4          | 92.8         |       |
|                                  | Normorphine                            | 30.3           | 109.5        | 38.6         | 106.5        | 42.8          | 87.3         |       |
|                                  | Methadone                              | 49.6           | 109          | 47.9         | 111.7        | 46.5          | 119.2        |       |
|                                  | Codeine                                | 39             | 94.8         | 68.4         | 102.8        | 67.5          | 93.1         |       |
|                                  | Dihydrocodeine                         | 34.7           | 85.7         | 54.8         | 118.6        | 66.4          | 98.5         |       |
|                                  | Norcodeine                             | 35.5           | 95.7         | 36.4         | 87.5         | 52.5          | 90.6         |       |
|                                  | Tramadol                               | 33.3           | 69.5         | 47           | 88.3         | 60.9          | 104.8        |       |
|                                  | N-desmethyltramadol                    | 17.9           | 81.3         | 33.4         | 98.8         | 42.2          | 69.1         |       |
| Antibacterial/antibiotics        | O-desmethyltramadol                    | 31.8           | 87.3         | 36           | 93.9         | 58.6          | 108.1        |       |
|                                  | Clarithromycin                         | 33.2           | 80.9         | 40.1         | 97.2         | 31            | 77.6         |       |
|                                  | Azithromycin                           | 22.2           | 101.1        | 24.5         | 67           | 21.9          | 86.9         |       |
|                                  | Trimethoprim                           | 41.4           | 109.6        | 59.8         | 123.7        | 59.2          | 118          |       |
|                                  | Sulfamethoxazole                       | 42.1           | 102.8        | 64           | 111          | 78.9          | 108.4        |       |
| Anti-cancer                      | Azathioprine                           | 72             | 109.5        | 81.5         | 83.8         | 88.9          | 66.4         |       |
|                                  | Methotrexate                           | 39.1           | 98.8         | 30.7         | 114.1        | 22.6          | 95.7         |       |
|                                  | Tamoxifen                              | 9.5            | 85.2         | 8.7          | 98.4         | 0.2           | 112.8        |       |
| Anti-depressants and metabolites | Ifosfamide                             | 33.4           | 89.2         | 41.9         | 80.2         | 62.9          | 90.8         |       |
|                                  | Fluoxetine                             | 19.8           | 110.7        | 7.1          | 111.1        | 4.4           | 112.3        |       |
|                                  | Norfluoxetine                          | 23.6           | 94.8         | 7.9          | 91.7         | 3             | 74.4         |       |
|                                  | Sertraline                             | 13.4           | 91.5         | 8.3          | 105          | 3.1           | 108          |       |
|                                  | Citalopram                             | 40.3           | 119.9        | 35.5         | 124.1        | 41.1          | 115          |       |
|                                  | Desmethylcitalopram                    | 32.5           | 93.1         | 27.5         | 110.9        | 36.2          | 89.5         |       |
|                                  | Venlafaxine                            | 23.8           | 70.2         | 36.3         | 89.5         | 58.8          | 96.8         |       |
| Anti-epileptic and metabolites   | Carbamazepine                          | 37.4           | 88.3         | 55.5         | 102.5        | 68.2          | 101.7        |       |
|                                  | Carbamazepine 10,11-epoxide            | 56.7           | 143.7        | 55           | 126.9        | 94.8          | 136.1        |       |
|                                  | 10,11-Dihydro -10-hydroxycarbamazepine | 50.3           | 152.2        | 59.5         | 120.6        | 74.1          | 125.1        |       |
| Anti-psychotic                   | Quetiapine                             | 37.8           | 72.6         | 46.8         | 95.1         | 51.6          | 87.2         |       |
| Antihistamine                    | Cetirizine                             | 48.6           | 77.3         | 78.8         | 114.3        | 47.9          | 77.3         |       |
| Beta-blocker                     | Atenolol                               | 42.8           | 88.6         | 54.6         | 109.7        | 76            | 115.1        |       |
|                                  | Metoprolol                             | 36.2           | 97.4         | 53.1         | 104.3        | 71.8          | 107.8        |       |
|                                  | Propranolol                            | 38.7           | 105          | 36.1         | 102.7        | 45.4          | 107.2        |       |
| Calcium channel blocker          | Diltiazem                              | 36.3           | 118.1        | 30.1         | 82.3         | 43.7          | 82.9         |       |
| Cough suppressant                | Pholcodine                             | 13.7           | 42           | 43.1         | 102          | 76.9          | 119.6        |       |
| Anti-diabetes                    | Metformin                              | 36.7           | 78.7         | 53           | 96           | 55.2          | 93.3         |       |
| Drug precursor and metabolite    | Gliclazide                             | 46.4           | 80.1         | 61.8         | 108.4        | 32.9          | 69.5         |       |
|                                  | Ephedrine/pseudoephedrine              | 23             | 92.8         | 18.7         | 88.6         | 25.4          | 67.8         |       |
|                                  | Norephedrine                           | 26.9           | 85.4         | 28.9         | 100.9        | 28.4          | 78.2         |       |
| H <sub>2</sub> receptor agonists | Ranitidine                             | 70.1           | 97.8         | 46.4         | 106.8        | 65            | 88.6         |       |
|                                  | Cimetidine                             | 20.6           | 123.7        | 33.4         | 106.2        | 32.7          | 95.3         |       |
| Nicotine and metabolites         | Nicotine                               | 98.5           | 77.3         | 55.7         | 83.9         | 45.3          | 54.9         |       |
|                                  | Caffeine                               | 82.9           | 96.6         | 89.8         | 131.7        | 137           | 122.8        |       |
|                                  | Cotinine                               | 37.4           | 85.2         | 47.3         | 101.5        | 72            | 105.9        |       |
| Hypertension                     | 1,7-dimethylxanthine                   | 89.3           | 79.6         | 26.6         | 110.6        | 47.5          | 75.5         |       |
|                                  | Lisinopril                             | 28.6           | 102.3        | 21.9         | 88.5         | 21.4          | 93.7         |       |
|                                  | Temazepam                              | 54.5           | 107.3        | 72.5         | 113.9        | 66.3          | 115.3        |       |
| Anti-inflammatory                | Acetaminophen                          | 77.8           | 77.8         | 44.8         | 116.4        | 44.4          | 140.5        |       |
| Stimulants and metabolites       | Heroin                                 | 23.9           | 105.3        | 29.1         | 103          | 54.1          | 100.9        |       |
|                                  | Amphetamine                            | 24.5           | 91.7         | 27.4         | 107.8        | 22.5          | 98.7         |       |
|                                  | Methamphetamine                        | 31.9           | 102.1        | 42.5         | 97.1         | 47.7          | 97.6         |       |
|                                  | MDMA                                   | 29.4           | 118.5        | 37           | 112.9        | 50            | 100.9        |       |
|                                  | MDA                                    | 30.7           | 99.4         | 30.3         | 99.1         | 28.7          | 99.6         |       |
|                                  | 6-acetylmorphine                       | 33.9           | 103.6        | 40           | 85.4         | 52.9          | 72.6         |       |
|                                  | Cocaine                                | 21.7           | 97.4         | 44.9         | 105.2        | 71.4          | 106.9        |       |
|                                  | Benzoylcegonine                        | 46.5           | 106.3        | 55.1         | 116.4        | 74.2          | 126.2        |       |
|                                  | Anhydroecgonine methylester            | 33.9           | 91.3         | 50.2         | 109.5        | 53.6          | 79.5         |       |
|                                  | Cocaethylene                           | 7.6            | 109.9        | 48.1         | 107.4        | 71.3          | 105.9        |       |
|                                  | Mephedrone                             | 18.2           | 94.8         | 22.8         | 103.7        | 22.8          | 97.3         |       |
|                                  | UV filter                              | 3-benzophenone | 27           | 58.5         | 51.9         | 89.4          | 33           | 74.4  |
|                                  | Veterinary                             | Tylosin        | 34.3         | 98.3         | 50.3         | 110           | 43.8         | 100.4 |
|                                  | X-ray contrast media                   | Iopromide      | 47.2         | 138.5        | 82.1         | 123.7         | 97           | 143   |





























**Table S13.** Maximum Environmental Concentrations (MECs), Predicted No-Effect Concentrations (PNECs) and Risk Quotients (RQs) for target compounds

| Micropollutant class                         | Micropollutants                       | PNEC ( $\mu\text{g L}^{-1}$ ) | Effluent                   |        | Surface Water              |        |   |
|----------------------------------------------|---------------------------------------|-------------------------------|----------------------------|--------|----------------------------|--------|---|
|                                              |                                       |                               | MEC ( $\text{ng L}^{-1}$ ) | RQ     | MEC ( $\text{ng L}^{-1}$ ) | RQ     |   |
| Anaesthetic and metabolite                   | Ketamine                              | -                             | <MQL                       | -      | <MQL                       | -      |   |
|                                              | Norketamine                           | -                             | <MQL                       | -      | <MQL                       | -      |   |
| Analgesics and metabolites                   | Morphine                              | -                             | <MQL                       | -      | <MQL                       | -      |   |
|                                              | Dihydromorphine                       | -                             | 49.2                       | -      | 33.9                       | -      |   |
|                                              | Normorphine                           | -                             | 27                         | -      | 110.5                      | -      |   |
|                                              | Methadone                             | -                             | <MQL                       | -      | <MQL                       | -      |   |
|                                              | Codeine                               | 1.280 <sup>a</sup>            | 1.5                        | 0.001  | 27.3                       | 0.021  |   |
|                                              | Dihydrocodeine                        | -                             | <MQL                       | -      | <MQL                       | -      |   |
|                                              | Norcodeine                            | -                             | <MQL                       | -      | <MQL                       | -      |   |
|                                              | Tramadol                              | -                             | 542.4                      | -      | 274                        | -      |   |
|                                              | N-desmethyltramadol                   | -                             | 722.7                      | -      | 108.7                      | -      |   |
| Antibacterial/antibiotics                    | O-desmethyltramadol                   | -                             | 1978                       | -      | 1056.9                     | -      |   |
|                                              | Clarithromycin                        | 0.050 <sup>b</sup>            | <MQL                       | -      | <MQL                       | -      |   |
|                                              | Azithromycin                          | -                             | <MQL                       | -      | <MQL                       | -      |   |
|                                              | Trimethoprim                          | 4.800 <sup>a</sup>            | 1043.5                     | 0.217  | 57.5                       | 0.012  |   |
|                                              | Sulfamethoxazole                      | 0.146 <sup>b</sup>            | 1,951.60                   | 13.367 | 1685.2                     | 11.542 |   |
| Anti-cancer                                  | Azathioprine                          | -                             | <MQL                       | -      | <MQL                       | -      |   |
|                                              | Methotrexate                          | -                             | <MQL                       | -      | <MQL                       | -      |   |
|                                              | Tamoxifen                             | 0.200 <sup>c</sup>            | 46.2                       | 0.231  | 22.9                       | 0.115  |   |
| Anti-depressants and metabolites             | Ifosfamide                            | -                             | <MQL                       | -      | <MQL                       | -      |   |
|                                              | Fluoxetine                            | 4.650 <sup>d</sup>            | 56.2                       | 0.012  | 49                         | 0.011  |   |
|                                              | Norfluoxetine                         | -                             | <MQL                       | -      | <MQL                       | -      |   |
|                                              | Sertraline                            | -                             | 557                        | -      | 0.3                        | -      |   |
|                                              | Citalopram                            | -                             | <MQL                       | -      | <MQL                       | -      |   |
|                                              | Desmethylcitalopram                   | -                             | <MQL                       | -      | <MQL                       | -      |   |
| Anti-epileptic and metabolites               | Venlafaxine                           | -                             | 1.2                        | -      | <MQL                       | -      |   |
|                                              | Carbamazepine                         | 0.395 <sup>a</sup>            | 493.4                      | 1.249  | 29.8                       | 0.075  |   |
|                                              | Carbamazepine 10,11 epoxide           | -                             | 139                        | -      | 31.8                       | -      |   |
| Anti-psychotic                               | 10,11 dihydro 10 hydroxycarbamazepine | -                             | 281                        | -      | <MQL                       | -      |   |
|                                              | Quetiapine                            | -                             | <MQL                       | -      | <MQL                       | -      |   |
| Antihistamine                                | Cetirizine                            | -                             | <MQL                       | -      | <MQL                       | -      |   |
| Beta-blocker                                 | Atenolol                              | 0.445 <sup>a</sup>            | 1418.1                     | 3.187  | 80.4                       | 0.181  |   |
|                                              | Metoprolol                            | 7.300 <sup>a</sup>            | 24.4                       | 0.003  | <MQL                       | -      |   |
|                                              | Propranolol                           | 0.094 <sup>a</sup>            | <MQL                       | -      | <MQL                       | -      |   |
| Calcium channel blocker                      | Diltiazem                             | 8.200 <sup>b</sup>            | 878.7                      | 0.107  | <MQL                       | -      |   |
| Cough suppressant                            | Pholcodine                            | -                             | <MQL                       | -      | <MQL                       | -      |   |
|                                              | Metformin                             | -                             | 568.7                      | -      | 8.6                        | -      |   |
| Anti-diabetes                                | Gliclazide                            | 1.335 <sup>d</sup>            | 972.5                      | 0.728  | 24.6                       | 0.018  |   |
|                                              | Ephedrine/pseudoephedrine             | -                             | 39.3                       | -      | 9.9                        | -      |   |
| Drug precursor and metabolite                | Norephedrine                          | -                             | 576.1                      | -      | 45.4                       | -      |   |
|                                              | Ranitidine                            | 6.600 <sup>a</sup>            | 593                        | 0.09   | 139.9                      | 0.021  |   |
|                                              | Cimetidine                            | 271.300 <sup>b</sup>          | 51.3                       | 0.0002 | 160.7                      | 0.001  |   |
| Nicotine and metabolites                     | Nicotine                              | -                             | 64                         | -      | 24.3                       | -      |   |
|                                              | Caffeine                              | -                             | <MQL                       | -      | <MQL                       | -      |   |
|                                              | Cotinine                              | -                             | 234                        | -      | 26.5                       | -      |   |
|                                              | 1,7 dimethylxantine                   | -                             | 6,624.30                   | -      | 465.6                      | -      |   |
| Hypertension                                 | Lisinopril                            | -                             | 151.5                      | -      | 10.2                       | -      |   |
|                                              | Temazepam                             | -                             | <MQL                       | -      | <MQL                       | -      |   |
| Anti-inflammatory Stimulants and metabolites | Acetaminophen                         | 0.253 <sup>a</sup>            | 9169.5                     | 36.243 | 9.8                        | 0.039  |   |
|                                              | Heroin                                | -                             | <MQL                       | -      | <MQL                       | -      |   |
|                                              | Amphetamine                           | -                             | 4515.5                     | -      | 26.8                       | -      |   |
|                                              | Methamphetamine                       | -                             | <MQL                       | -      | 1.8                        | -      |   |
|                                              | MDMA                                  | -                             | <MQL                       | -      | <MQL                       | -      |   |
|                                              | MDA                                   | -                             | 194                        | -      | <MQL                       | -      |   |
|                                              | 6-acetylmorphine                      | -                             | <MQL                       | -      | <MQL                       | -      |   |
|                                              | Cocaine                               | -                             | <MQL                       | -      | <MQL                       | -      |   |
|                                              | Benzoyllecgonine                      | -                             | 1841.6                     | -      | <MQL                       | -      |   |
|                                              | Anhydroecgonine methylester           | -                             | 42                         | -      | 20                         | -      |   |
|                                              | Cocaethylene                          | -                             | <MQL                       | -      | <MQL                       | -      |   |
|                                              | Mephedrone                            | -                             | 15.5                       | -      | <MQL                       | -      |   |
|                                              | 3-benzophenone                        | -                             | 309.1                      | -      | <MQL                       | -      |   |
|                                              | UV filter                             | Tylosin                       | -                          | <MQL   | -                          | <MQL   | - |
|                                              | Veterinary                            |                               |                            |        |                            |        |   |
|                                              | X-ray contrast media                  | Iopromide                     | -                          | <MQL   | -                          | <MQL   | - |

## References

- 1 K. Proctor, B. Petrie, R. Barden, T. Arnot and B. Kasprzyk-hordern, *Anal. Bioanal. Chem.*, 2019, **411**, 7061–7086.
